# Supplementary material for: Thermal (In)stability of Atropine and Scopolamine in the GC-MS Inlet
Source: MDPI journal article supplement (doi:10.3390/toxics9070156), 2021-06-30
Supplement: s1 [file s1]

# Supplementary Materials: Thermal (In)stability of Atropine and Scopolamine in the GC-MS Inlet

Gordana Koželj and Helena Prosen

**Table S1.** Relation between sums of areas of particular tropane and main degradation products in different solvents at different injector  $T$ .

Relation between sums of areas of atropine and main products in different solvents at different injector  $T$ .

| Injector $T$<br>(°C) | Areas in ethyl acetate/areas in<br>methanol (%) | Areas in $n$ -hexane/areas in<br>methanol (%) |
|----------------------|-------------------------------------------------|-----------------------------------------------|
| 110                  | 0.035                                           | 0.005                                         |
| 130                  | 0.018                                           | 0.119                                         |
| 150                  | 0.037                                           | 0.004                                         |
| 170                  | 0.053                                           | 0.000                                         |
| 190                  | 0.043                                           | 0.000                                         |
| 210                  | 0.039                                           | 0.002                                         |
| 230                  | 0.037                                           | 0.005                                         |
| 250                  | 0.035                                           | 0.000                                         |

Relation between sum of areas of scopolamine and main products in different solvents at different injector  $T$ .

| Injector $T$<br>(°C) | Areas in ethyl acetate/areas in<br>methanol (%) | Areas in $n$ -hexane/areas in<br>methanol (%) |
|----------------------|-------------------------------------------------|-----------------------------------------------|
| 110                  | 0.017                                           | 0.078                                         |
| 130                  | 0.012                                           | 0.342                                         |
| 150                  | 0.020                                           | 0.008                                         |
| 170                  | 0.017                                           | 0.000                                         |
| 190                  | 0.014                                           | 0.001                                         |
| 210                  | 0.010                                           | 0.001                                         |
| 230                  | 0.009                                           | 0.001                                         |
| 250                  | 0.009                                           | 0.000                                         |

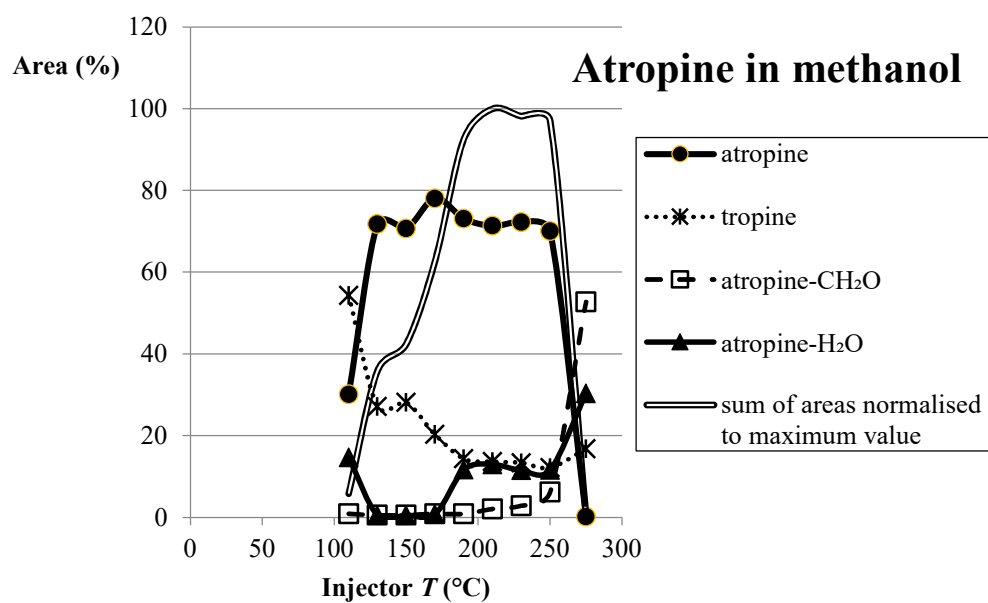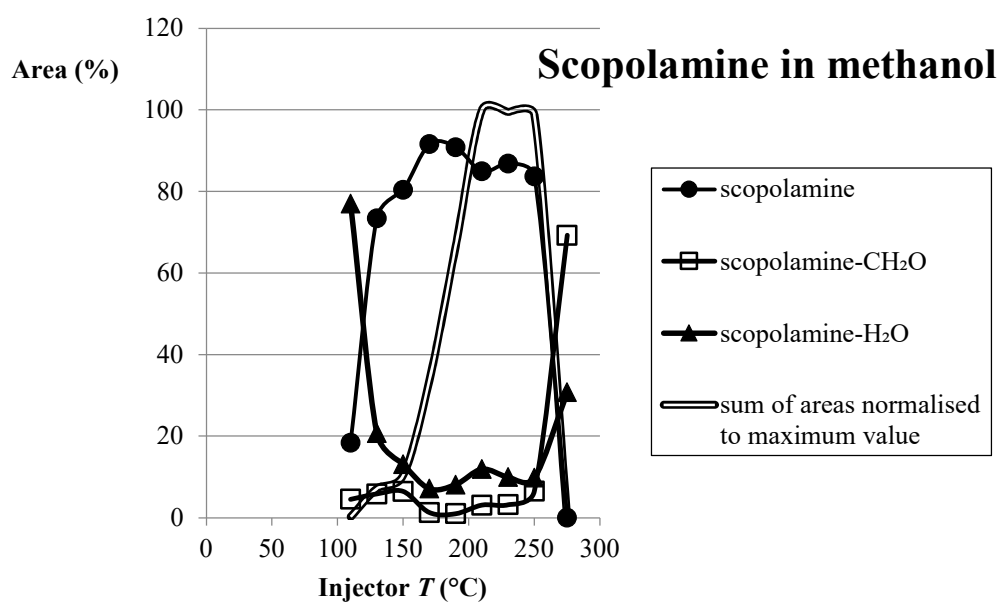

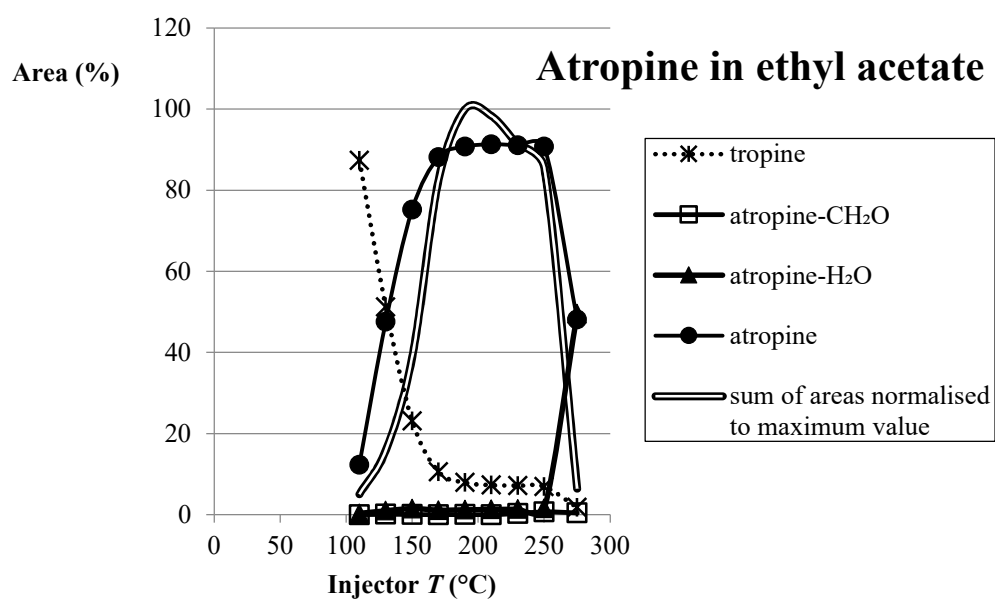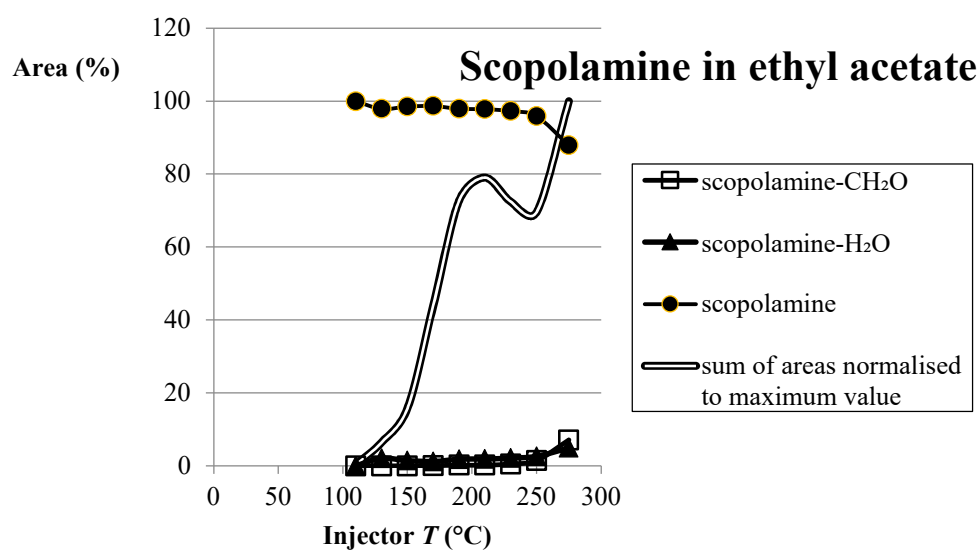

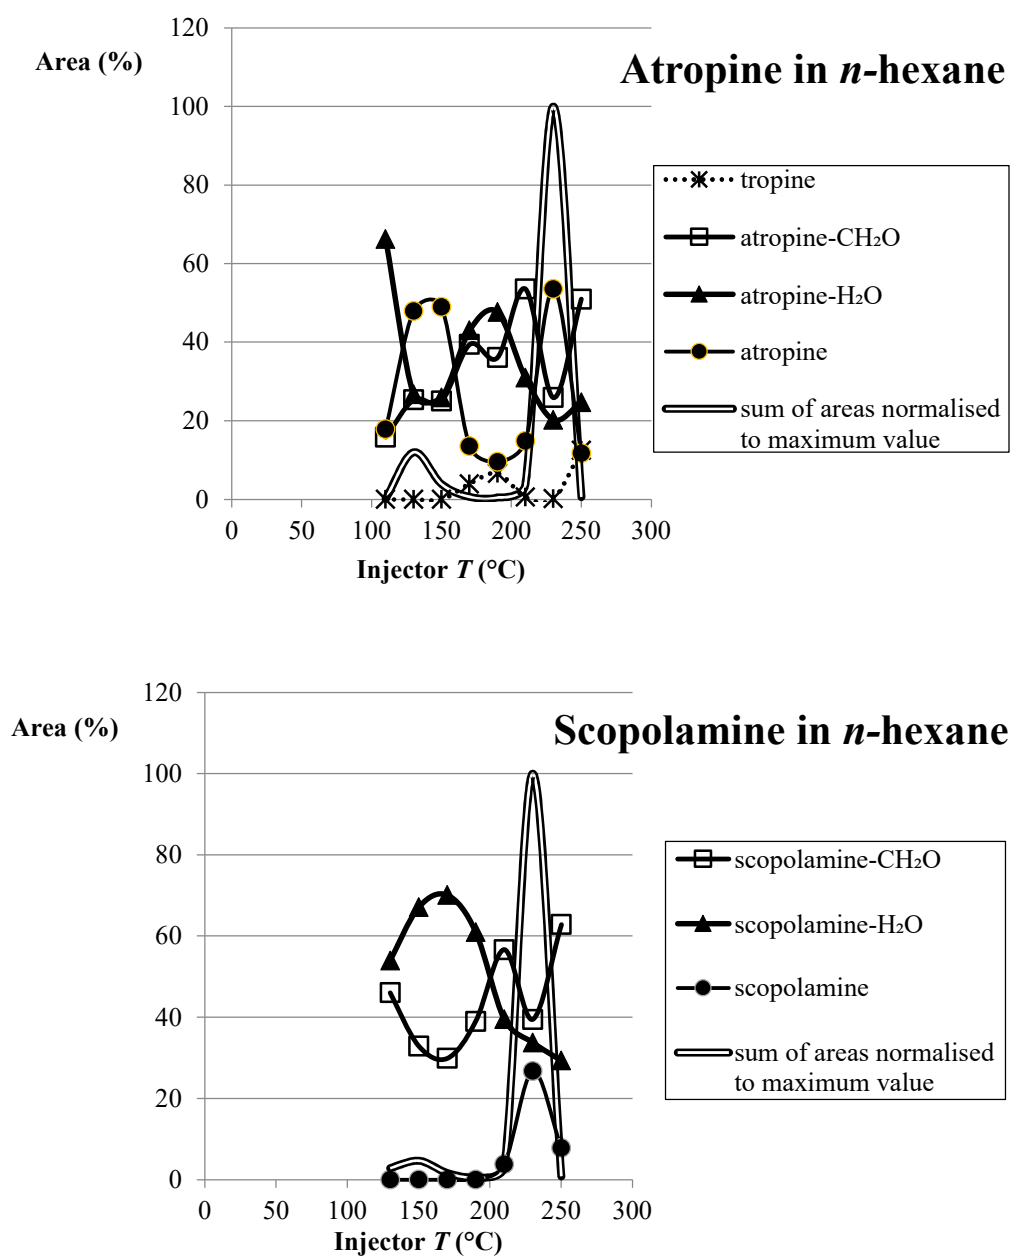

**Figure S1.** Influence of injector temperature on peak areas of atropine, scopolamine and their main products of thermolysis in three solvents: methanol, ethyl acetate and *n*-hexane.
